# Supplementary material
Source: publisher figshare collection journal article supplement (https://sage.figshare.com/ndownloader/files/17591486)
Supplement: Supplementary file 1 [file 17591486]

## Inclusion criteria

- Age 6 months to <16 years
  - Presentation January 1, 2005-December 31, 2010
  - New-onset epilepsy
- Total  $n = 5\,396$

## Exclusions

- Pre-existing Complex Chronic Condition ( $n = 205$ )
- Never prescribed Anti-Epileptic Drug ( $n = 3\,847$ )
- Alternative cause of seizures ( $n = 557$ )
- Missing data ( $n = 11$ )

## Study population

$n = 776$  patients

### not in remission

(Pharmacoresistant/Intractable)

$n = 291$

### Remission

$n = 485$
